# Supplementary material
Source: MDPI journal article supplement (https://www.mdpi.com/2076-3417/8/3/356)
Supplement: s1 [file s1]

Temperature Dependence on Density, Viscosity, Conductivity of 1-Ethyl-3-Methylimidazolium Fluoride Ionic Liquid

Fengguo Liu 1, Xiongwei Zhong 2, Junli Xu 3, Ali Kamali 1 and Zhongning Shi 1,*

1 School of Metallurgy, Northeastern University, No. 3-11, Wenhua Road, Shenyang 110819, China; liufg@smm.neu.edu.cn (F.L.); ali@smm.neu.edu.cn (A.K.)

2 Department of Materials Science and Engineering, Southern University of Science and Technology,
No. 1088, Xueyuanda Road, Shenzhen 518055, China; zhongxw@mail.sustc.edu.cn

3 School of Science, Northeastern University, No. 3-11, Wenhua Road, Shenyang 110819, China; jlxu@mail.neu.edu.cn

* Correspondence: shizn@smm.neu.edu.cn; Tel.: +86-024-8368-6381

**Table S1.** Density of [EMIm]F at different temperatures.

| Temperature(K) | Density(g·cm-3) |
| --- | --- |
| 303.15 | 1.14542 |
| 308.15 | 1.14107 |
| 313.15 | 1.13462 |
| 318.15 | 1.12859 |
| 323.15 | 1.12277 |
| 328.15 | 1.11599 |
| 333.15 | 1.11165 |
| 338.15 | 1.10364 |
| 343.15 | 1.09792 |
| 348.15 | 1.09171 |
| 353.15 | 1.08524 |

**T**able S2. Viscosity of [EMIm]F at different temperatures.

| Temperature(K) | Viscosity(mPa·s) |
| --- | --- |
| 282.9 | 1955.58 |
| 286.1 | 1409.7 |
| 287.9 | 1262.73 |
| 289.9 | 1067.77 |
| 292.8 | 734.84 |
| 297.9 | 479.9 |
| 300.8 | 380.32 |
| 305.8 | 263.34 |
| 307.9 | 229.67 |
| 310.9 | 185.53 |
| 313 | 164.54 |
| 318 | 122.07 |
| 323.1 | 91.89 |
| 328 | 71.98 |
| 333.1 | 57.74 |
| 338.2 | 44.79 |
| 343.1 | 36.4 |
| 348.1 | 29.89 |
| 353.1 | 24.84 |
| 358 | 20.81 |

**T**able S3. Electrical conductivity of [EMIm]F at different temperatures

| Temperature(K) | Conductivity(mS·cm-1) |
| --- | --- |
| 298 | 3.18075 |
| 299 | 3.39718 |
| 300 | 3.53145 |
| 301 | 3.75535 |
| 302 | 4.00359 |
| 303 | 4.18709 |
| 304 | 4.26047 |
| 305 | 4.45531 |
| 306 | 4.63334 |
| 307 | 4.83524 |
| 308 | 5.06325 |
| 309 | 5.3163 |
| 310 | 5.6164 |
| 311 | 5.95408 |
| 312 | 6.32799 |
| 313 | 6.66074 |
| 314 | 6.92964 |
| 315 | 7.10567 |
| 316 | 7.35934 |
| 317 | 7.66797 |
| 318 | 8.02347 |
| 319 | 8.42141 |
| 320 | 8.80398 |
| 321 | 9.18604 |
| 322 | 9.53743 |
| 323 | 9.95511 |
| 324 | 10.27036 |
| 325 | 10.52483 |
| 326 | 11.02518 |
| 327 | 11.48799 |
| 328 | 11.9369 |
| 329 | 12.37237 |
| 330 | 12.78746 |
| 331 | 13.30533 |
| 332 | 13.8456 |
| 333 | 14.41051 |
| 334 | 14.83498 |
| 335 | 15.36021 |
| 336 | 15.91476 |
| 337 | 16.51929 |
| 338 | 16.99117 |
| 339 | 17.55627 |
| 340 | 18.14563 |
| 341 | 18.85591 |
| 342 | 19.56593 |
| 343 | 20.20517 |
| 344 | 20.78848 |
| 345 | 21.43883 |
| 346 | 22.10134 |
| 347 | 22.69329 |
| 348 | 23.1965 |
| 349 | 23.90818 |
| 350 | 24.45362 |
| 351 | 25.21911 |
| 352 | 25.90417 |
| 353 | 26.58038 |
| 354 | 27.39476 |
| 355 | 27.95566 |
| 356 | 28.60342 |
| 357 | 29.14796 |
| 358 | 30.0964 |
| 359 | 30.92487 |
| 360 | 31.50169 |
| 361 | 32.39219 |
| 362 | 33.23265 |
| 363 | 34.0378 |
| 364 | 34.80114 |
| 365 | 35.78125 |
| 366 | 36.68007 |
| 367 | 37.81694 |
| 368 | 39.08942 |
| 369 | 39.59983 |
| 370 | 41.49354 |
| 371 | 42.19435 |
| 372 | 42.97919 |
| 373 | 43.52634 |
